# Supplementary material for: Modeling energy balance while correcting for measurement error via free knot splines
Source: PubMed Central journal article supplement (PMC6116982; doi:10.1371/journal.pone.0201892), 2018-08-30
Supplement: pone.0201892.s001.pdf [file pone.0201892.s001.pdf]

**S1 Appendix Gibbs Algorithm for the Spline Model.** Here we present our Gibbs algorithm to sample from the joint posterior distribution.

1. Set starting values. Let  $i = 1, \dots, n$  index individuals, and  $j = 1, \dots, J$  index replicates within individual. Assume for simplicity each individual has the same number of replicates.
2. Run the MCMC below B times. Every b iterations, update tuning parameters  $C_{X_i}$ , the covariance for the random walk proposal distribution by setting

$$C_{X_i} = \frac{2.4^2}{2} \frac{1}{B-1} \sum_{b=1}^B (X_i^{EE(b)} - \bar{X}^{EE})(X_i^{\Delta ES(b)} - \bar{X}^{\Delta ES}). \quad (1)$$

Repeat desired number of times, then discard burn-in draws and continue using new tuning values. (See [1], pg. 290)

3. For iteration  $k=1, \dots, K$ , sample from the full conditional distributions:

- (a)  $\{\zeta_i^{(k)} : i = 1, \dots, n\} \mid \cdot$  where  $P(\zeta_i^{(k)} = h) = \frac{\pi_h^{(k-1)} N(\mu_h^{(k-1)}, \Sigma_h^{(k-1)})}{\sum_{h=1}^H \pi_h^{(k-1)} N(\mu_h^{(k-1)}, \Sigma_h^{(k-1)})}$ .
- (b) Draw  $\{V_h^{(k)} : h = 1, \dots, H-1\} \mid \cdot \stackrel{ind}{\sim} \text{Beta}(1 + n_h, \alpha + n'_h)$ ,  
With  $V_H^{(k)} = 1$   
 $n_h = \sum_{i=1}^n I(\zeta_i^{(k)} = h)$   
 $n'_h = \sum_{h'=h+1}^H n_{h'}$ .
- (c) Calculate  $\{\pi_i^{(k)} : i = 1, \dots, n\} = V_i^{(k)} \prod_{\ell < i} (1 - V_\ell^{(k)})$ .
- (d) Draw  $\{\Sigma_h^{(k)}, h = 1, \dots, H\} \mid \cdot \stackrel{ind}{\sim}$   
 $\text{Inv-Wish}(d + n_h, \psi + (\mathbf{X}_{i,h}^{(k-1)} - \mu_h^{(k-1)})'(\mathbf{X}_{i,h}^{(k-1)} - \mu_h^{(k-1)}))$ ,  
with  
 $\mathbf{X}_{i,h} \equiv \mathbf{X}_i I(\zeta_i^{(k)} = h)$   
 $\mathbf{X}_i = (X_i^{EE}, X_i^{\Delta ES})$   
 $\mu_h = (\mu_{EE,h}, \mu_{\Delta ES,h})$ .
- (e) Draw  $\{(\mu_{EE,h}^{(k)}, \mu_{\Delta ES,h}^{(k)}), h = 1, \dots, H\} \mid \cdot \stackrel{ind}{\sim} N(M'_\mu, C'_\mu)$ ,  
with  
 $C'_\mu = (C_\mu^{-1} + n_h \Sigma_h^{-1(k)})^{-1}$   
 $M'_\mu = C'_\mu (C_\mu^{-1} M + n_h \Sigma_h^{-1(k)} \bar{\mathbf{X}}^{(k-1)})$   
 $\bar{\mathbf{X}} = \frac{1}{n_h} \sum_{i=1}^n \mathbf{X}_{i,h}$ .
- (f) Update  $\mathbf{X}_i$  with a random walk  
 $\{\mathbf{X}_i^{(k)} : i = 1, \dots, n\} \mid \cdot$  for  $i = 1, \dots, n$  sample  $\mathbf{X}_i^*$  from  $N(\mathbf{X}_i^{(k)}, C_{X_i})$ ,  
and set  $\mathbf{X}_i^{(k)} = \mathbf{X}_i^*$  with probability  $\alpha_{X_i}$ , otherwise set  $\mathbf{X}_i^{(k)} = \mathbf{X}_i^{(k-1)}$ ,  
where  
 $\alpha_{X_i} = \min \left( 1, \frac{f(\mathbf{X}_i^* \mid \cdot)}{f(\mathbf{X}_i^{(k-1)} \mid \cdot)} \right)$ .
- (g) Update  $\beta_{ee}, \beta_{es}, k_{ee}, k_{es}, r_{ee}, r_{es}, \gamma_{ee}, \gamma_{es}$  using RJMCMC described in next section. Calculate  $s_{ee}(\mathbf{X}^{EE(k)}; \beta_{ee}^{(k)})$  and  $s_{es}(\mathbf{X}^{\Delta ES(k)}; \beta_{es}^{(k)})$ .
- (h) Draw  $\sigma_{\epsilon_{EE}}^{2(k)} \mid \cdot \sim$   
 $IG \left( a_{yee} + J \times \frac{n}{2}, b_{yee} + \frac{1}{2} \sum_{i=1}^n \sum_{j=1}^J \left( Y_{ij}^{EE} - s_{ee}(X_i^{EE(k)}; \beta_{ee}^{(k)}) - \gamma_{ee}^{(k)'} Z_i \right)^2 \right)$ .

- (i) Draw  $\sigma_{\epsilon^{\Delta ES}}^{2(k)} | \cdot \sim IG \left( a_{yes} + J \times \frac{n}{2}, b_{yes} + \frac{1}{2} \sum_{i=1}^n \sum_{j=1}^J \left( Y_{ij}^{\Delta ES} - s_{es}(X_i^{\Delta ES(k)}; \beta_{es}^{(k)}) - \gamma_{es}^{(k)'} Z_i \right)^2 \right)$
- (j) Draw  $\sigma_{\nu^{EE}}^{2(k)} | \cdot \sim IG \left( a_{wee} + J \times \frac{n}{2}, b_{wee} + \frac{1}{2} \sum_{i=1}^n \sum_{j=1}^J \left( W_{ij}^{EE} - X_i^{EE(k)} \right)^2 \right)$ .
- (k) Draw  $\sigma_{\nu^{\Delta ES}}^{2(k)} | \cdot \sim IG \left( a_{wes} + J \times \frac{n}{2}, b_{wes} + \frac{1}{2} \sum_{i=1}^n \sum_{j=1}^J \left( W_{ij}^{\Delta ES} - X_i^{\Delta ES(k)} \right)^2 \right)$ .
- The steps above describe one iteration in the algorithm.

## References

1. Gelman A, Carlin JB, Stern HS, Dunson DB, Vehtari A, Rubin DB. Bayesian Data Analysis. Chapman and Hall/CRC; 2014.
