# Supplementary material for: Modeling energy balance while correcting for measurement error via free knot splines
Source: PubMed Central journal article supplement (PMC6116982; doi:10.1371/journal.pone.0201892), 2018-08-30
Supplement: pone.0201892.s003.pdf [file pone.0201892.s003.pdf]

### S3 Appendix Full Model Likelihood

$$\begin{aligned}
 L_i(\boldsymbol{\theta}) &= \prod_{j=1}^J f(W_{ij}^{EE}, W_{ij}^{\Delta ES}, Y_{ij}^{EE}, Y_{ij}^{\Delta ES} | Z_i, \boldsymbol{\theta}) \\
 &= \int_{\mathcal{X}_{es}} \int_{\mathcal{X}_{ee}} \prod_{j=1}^J f(W_{ij}^{EE}, W_{ij}^{\Delta ES}, Y_{ij}^{EE}, Y_{ij}^{\Delta ES}, X_i^{EE}, X_i^{\Delta ES} | Z_i, \boldsymbol{\theta}) dX_i^{EE} dX_i^{\Delta ES} \\
 &= \prod_{j=1}^J \int_{\mathcal{X}_{es}} \int_{\mathcal{X}_{ee}} f(W_{ij}^{EE} | X_i^{EE}, X_i^{\Delta ES}, Z_i, \boldsymbol{\theta}_{wee}) f(W_{ij}^{\Delta ES} | X_i^{EE}, X_i^{\Delta ES}, Z_i, \boldsymbol{\theta}_{wes}) \times \\
 &\quad f(Y_{ij}^{EE} | X_i^{EE}, X_i^{\Delta ES}, Z_i, \boldsymbol{\theta}_{yee}) f(Y_{ij}^{\Delta ES} | X_i^{EE}, X_i^{\Delta ES}, Z_i, \boldsymbol{\theta}_{yes}) \times \\
 &\quad f(X_i^{EE}, X_i^{\Delta ES} | Z_i, \boldsymbol{\theta}_x) dX_i^{EE} dX_i^{\Delta ES} \\
 &= \prod_{j=1}^J \int_{\mathcal{X}_{es}} \int_{\mathcal{X}_{ee}} f(W_{ij}^{EE} | X_i^{EE}, Z_i, \boldsymbol{\theta}_{wee}) f(W_{ij}^{\Delta ES} | X_i^{\Delta ES}, Z_i, \boldsymbol{\theta}_{wes}) \times \\
 &\quad f(Y_{ij}^{EE} | X_i^{EE}, Z_i, \boldsymbol{\theta}_{yee}) f(Y_{ij}^{\Delta ES} | X_i^{\Delta ES}, Z_i, \boldsymbol{\theta}_{yes}) \times \\
 &\quad f(X_i^{EE}, X_i^{\Delta ES} | Z_i, \boldsymbol{\theta}_x) dX_i^{EE} dX_i^{\Delta ES},
 \end{aligned} \tag{1}$$

where the RHS is expanded in (1). Since we assume that individuals are independent, the full likelihood is

$$L(\boldsymbol{\theta}) = \prod_{i=1}^n L_i(\boldsymbol{\theta}). \tag{2}$$
